# Supplementary material
Source: publisher figshare collection journal article supplement (https://tandf.figshare.com/ndownloader/files/14132465)
Supplement: Supplementary file 1 [file 14132465]

**Table S1. Demographic Characteristics of Participants at Baseline, 5 time points vs. less than 5 time points, Energy Balance Study, Columbia, SC, USA, 2011-2014.**

| Variable                          | 5 time<br>points<br>n=151 | < 5 time<br>points<br>n=239 | p    |
|-----------------------------------|---------------------------|-----------------------------|------|
| Age (years, mean±std)             | 27.8±3.8                  | 27.4±3.7                    | 0.25 |
| Sex                               |                           |                             |      |
| male                              | 80 (53)                   | 112 (47)                    | 0.24 |
| female                            | 71 (47)                   | 127 (53)                    |      |
| Race, n (%)                       |                           |                             |      |
| European American                 | 104 (69)                  | 160 (67)                    | 0.59 |
| African American                  | 14 (9)                    | 33 (14)                     |      |
| Hispanic/Latino                   | 6 (4)                     | 5 (2)                       |      |
| Asian                             | 16 (11)                   | 26 (11)                     |      |
| Native American                   | 4 (3)                     | 8 (3)                       |      |
| Mixed Race                        | 7 (5)                     | 7 (3)                       |      |
| Education, n (%)                  |                           |                             |      |
| HS Graduate/GED                   | 19 (12)                   | 43 (18)                     | 0.15 |
| Some College                      |                           |                             |      |
| College (4+ years)                | 132 (88)                  | 196 (82)                    |      |
| Income (\$), n (%)                |                           |                             |      |
| < 20,000                          | 29 (19)                   | 36 (15)                     | 0.36 |
| 20,000 to < 40,000                | 47 (31)                   | 90 (38)                     |      |
| 40,000 to < 60,000                | 32 (21)                   | 42 (18)                     |      |
| 60,000 to < 80,000                | 22 (15)                   | 28 (12)                     |      |
| ≥ 80,000                          | 20 (13)                   | 42 (17)                     |      |
| Employment, n (%)                 |                           |                             |      |
| Employed and self<br>employed     | 80 (53)                   | 134 (56)                    | 0.55 |
| Student/other <sup>1</sup>        | 71 (47)                   | 105 (44)                    |      |
| Marital status, n                 |                           |                             |      |
| Married <sup>2</sup>              | 75 (50)                   | 103 (43)                    | 0.20 |
| Single <sup>3</sup>               | 76 (50)                   | 136 (57)                    |      |
| Children, age<br><18 years, n (%) |                           |                             |      |
| 0                                 | 130 (86)                  | 206 (86)                    | 0.69 |
| 1                                 | 13 (9)                    | 16 (7)                      |      |
| ≥ 2                               | 8 (5)                     | 17 (7)                      |      |

p: two-sample t-test p-value for age; Chi-Square test p-value for all categorical variables. <sup>1</sup> Out of work (<1 year), homemaker, unable to work (n=4, 1%). <sup>2</sup> Includes members of unmarried couples (n=55, 14%). <sup>3</sup> Includes divorced and separated (n=7, 1.7%).
